# Supplementary material for: The combination of microbiome and metabolome to analyze the cross-cooperation mechanism ofEchinacea purpureapolysaccharide with the gut microbiotain vitroandin vivo
Source: Royal Society of Chemistry journal article supplement (doi:10.1039/d2fo02336a), 2022-01-01
Supplement: d2fo02336a2.pdf [file d2fo02336a2.pdf]

The EPP mainly composed of arabinose, galactose, glucose, mannose, galacturonic acid, and glucuronic acid in molar ratios of 13.42:25.12:10.92:8.59:2.07:0.82.

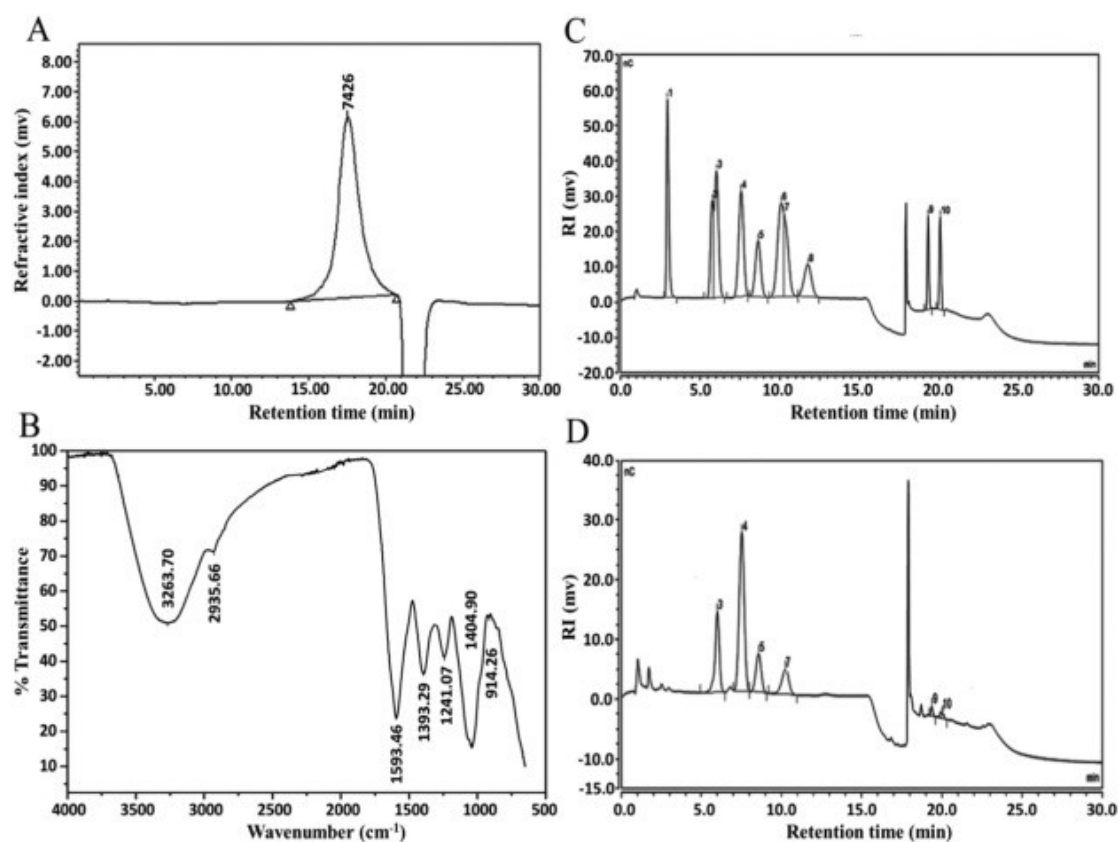

Fig. Structural characterizations of EPP. (A) HPSEC-RI chromatogram of EPP. (B) FT-IR spectrum of EPP. (C) HPLC chromatograms of PMP derivatives of monosaccharide standard samples (1. Fuc, 2. Rha, 3. Ara, 4. Gal, 5. Glc, 6. Xly, 7. Man, 8. Fru, 9. GlaA, 10. GlcA). (D) Monosaccharide composition of EPP.
